# Supplementary material
Source: Springer Nature journal article supplement (https://www.springermedizin.de/resource/supplementary/12947_2009_262_MOESM4_ESM.pdf/9556566)

present in % of patients with cryptogenic stroke

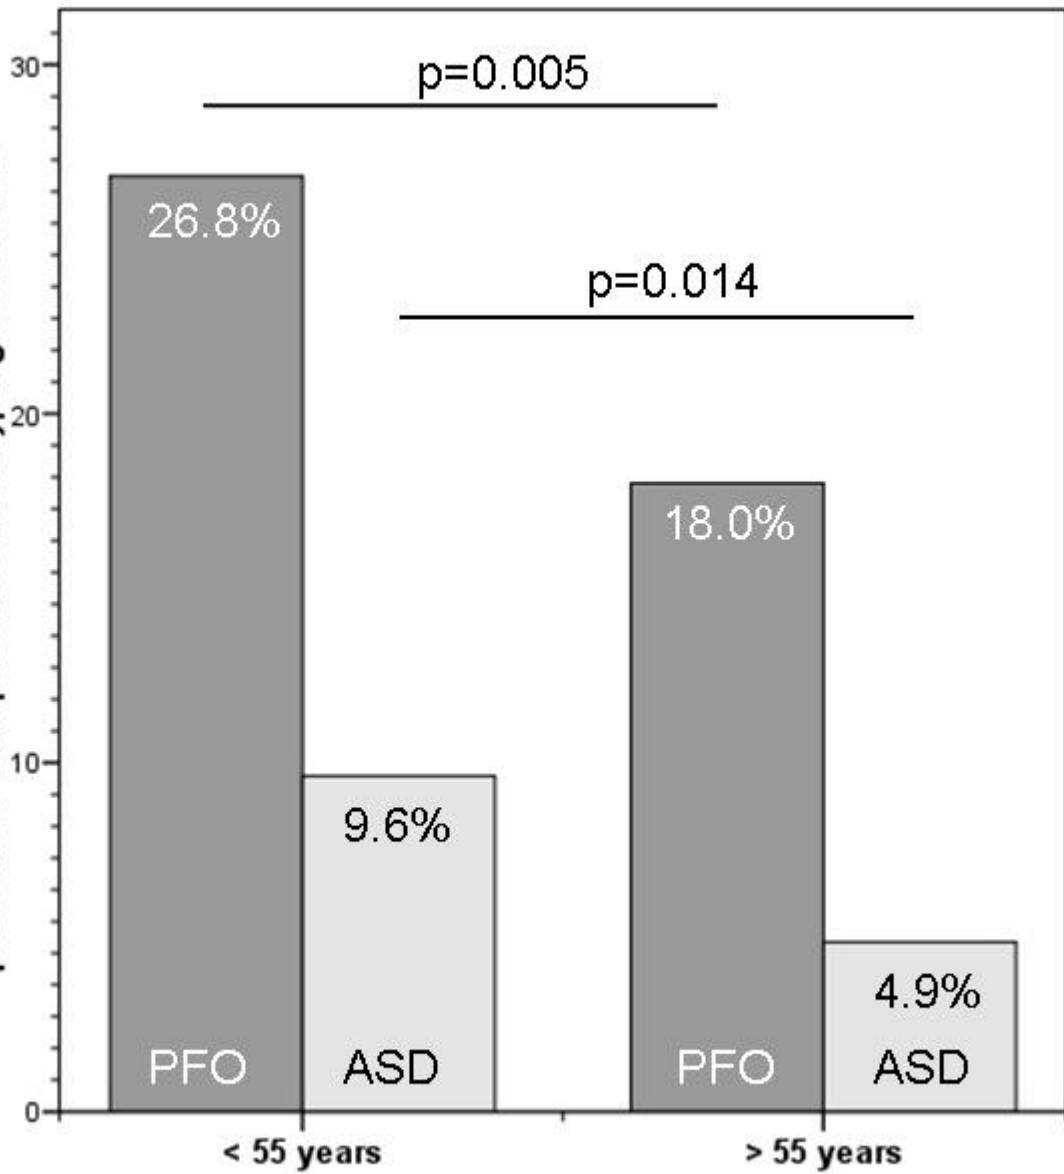

Supplement: MOESM4 [file 9556566]
